# Supplementary material for: Photophysical Properties and Kinetic Studies of 2-Vinylpyridine-Based Cycloplatinated(II) Complexes Containing Various Phosphine Ligands
Source: MDPI journal article supplement (doi:10.3390/molecules26072034), 2021-04-02
Supplement: s1 [file s1]

## Supporting Information

### Photophysical Properties and Kinetic Studies of 2-Vinylpyridine-Based Cycloplatinated(II) Complexes Containing Various Phosphine Ligands

Vahideh Dolatyari,<sup>a</sup> Hamid R. Shahsavari,<sup>a\*</sup> Sepideh Habibzadeh,<sup>b</sup> Reza Babadi Aghakhanpour,<sup>a\*</sup> Sareh Pazireh,<sup>a</sup> Mohsen Golbon Haghighi,<sup>c</sup> Mohammad Reza Halvagar<sup>d</sup>

<sup>a</sup> Department of Chemistry, Institute for Advanced Studies in Basic Sciences (IASBS), Zanzan, 45137-66731, Iran. Email: [shahsavari@iasbs.ac.ir](mailto:shahsavari@iasbs.ac.ir) (H.R.S.); [babadi@iasbs.ac.ir](mailto:babadi@iasbs.ac.ir) (R.B.A.).

<sup>b</sup> Department of Chemistry, Payame Noor University, P.O. BOX 19395-4697 Tehran, Iran

<sup>c</sup> Department of Chemistry, Shahid Beheshti University, Evin, Tehran 19839-69411, Iran.

<sup>d</sup> Department of Inorganic Chemistry, Chemistry and Chemical Engineering Research Center of Iran, Tehran 14968-13151, Iran.

| Contents                                                                                                                    | Page |
|-----------------------------------------------------------------------------------------------------------------------------|------|
| <b>Figure S1.</b> $^1\text{H}$ NMR spectrum of <b>1a</b> in acetone- $d_6$ .                                                | S3   |
| <b>Figure S2.</b> $^1\text{H}$ NMR spectrum of <b>1c</b> in acetone- $d_6$ .                                                | S4   |
| <b>Figure S3.</b> $^1\text{H}$ NMR spectrum of <b>3a</b> in acetone- $d_6$ .                                                | S5   |
| <b>Figure S4.</b> $^1\text{H}$ NMR spectrum of <b>2c</b> in acetone- $d_6$ .                                                | S6   |
| <b>Figure S5.</b> $^{31}\text{P}\{^1\text{H}\}$ NMR spectrum of <b>1a</b> in acetone- $d_6$ .                               | S7   |
| <b>Figure S6.</b> $^{31}\text{P}\{^1\text{H}\}$ NMR spectrum of <b>1c</b> in acetone- $d_6$ .                               | S8   |
| <b>Figure S7.</b> $^{31}\text{P}\{^1\text{H}\}$ NMR spectrum of <b>3a</b> in acetone- $d_6$ .                               | S9   |
| <b>Figure S8.</b> $^{31}\text{P}\{^1\text{H}\}$ NMR spectrum of <b>2c</b> in acetone- $d_6$ .                               | S10  |
| <b>Table S1.</b> Crystal data and structure refinements for <b>1c</b> and <b>2c</b> .                                       | S11  |
| <b>Figure S9.</b> Optimized structures of a) <b>1a</b> , b) <b>1b</b> and c) <b>1c</b> in $\text{CH}_2\text{Cl}_2$ solvent. | S12  |
| <b>Table S2.</b> Selected geometrical parameters for the optimized structures of <b>1a-c</b> .                              | S12  |
| <b>Table S3.</b> Composition (%) of frontier MOs in the ground state for <b>1a</b> in $\text{CH}_2\text{Cl}_2$ solvent.     | S13  |
| <b>Table S4.</b> Composition (%) of frontier MOs in the ground state for <b>1b</b> in $\text{CH}_2\text{Cl}_2$ solvent.     | S13  |
| <b>Table S5.</b> Composition (%) of frontier MOs in the ground state for <b>1c</b> in $\text{CH}_2\text{Cl}_2$ solvent.     | S14  |
| <b>Figure S10.</b> Selected MO plots of <b>1a</b> .                                                                         | S15  |
| <b>Figure S11.</b> Selected MO plots of <b>1b</b> .                                                                         | S16  |
| <b>Figure S12.</b> Selected MO plots of <b>1c</b> .                                                                         | S17  |

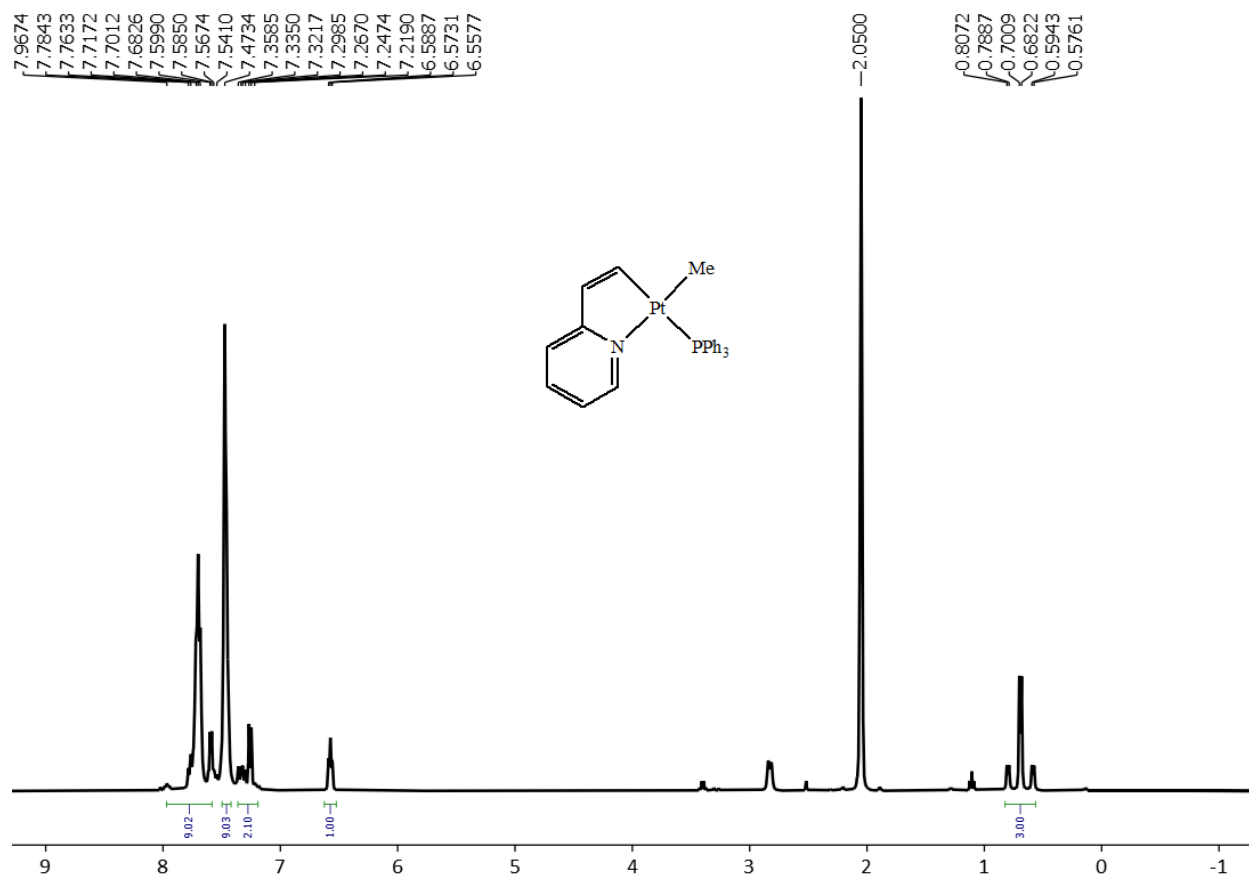

**Figure S1.** <sup>1</sup>H NMR spectrum of **1a** in acetone-*d*<sub>6</sub>.

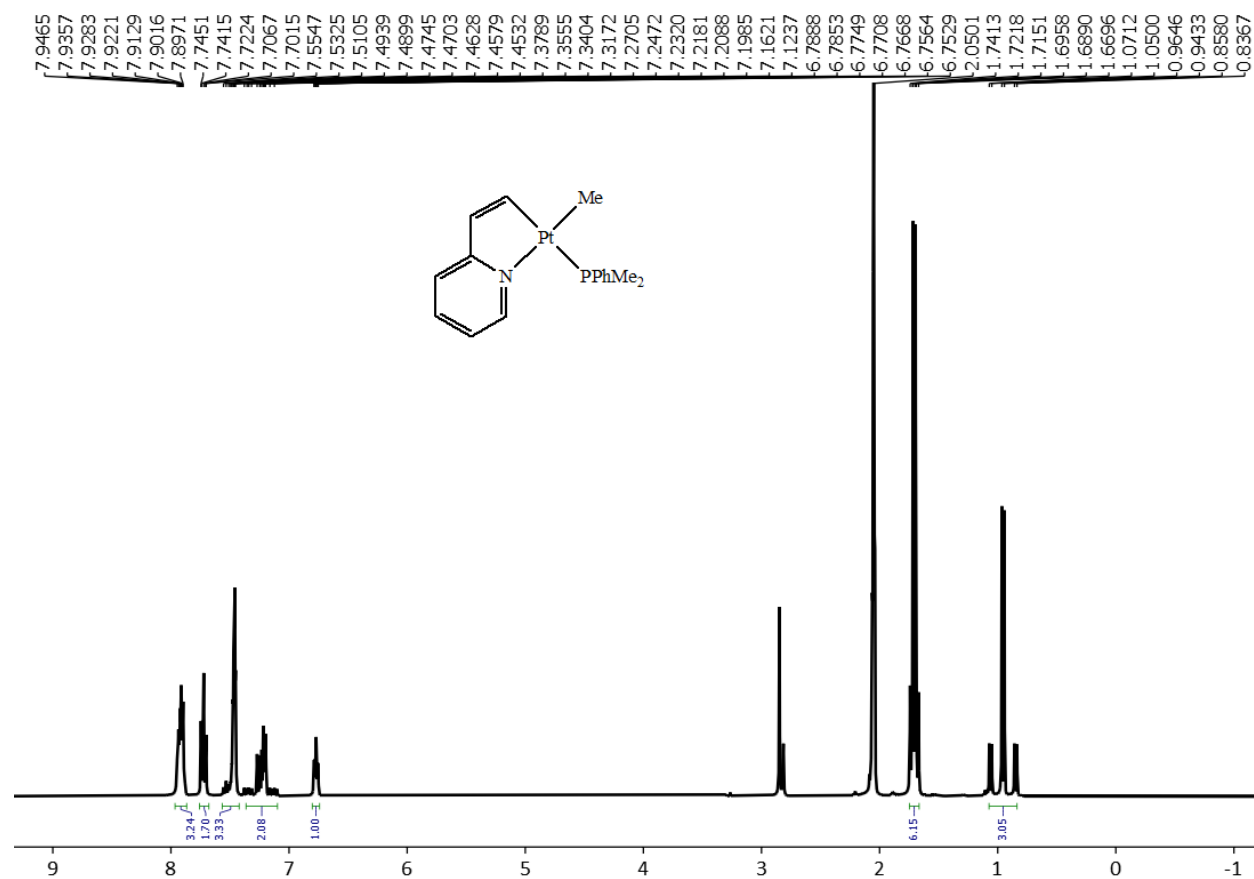

**Figure S2.** <sup>1</sup>H NMR spectrum of **1c** in acetone-*d*<sub>6</sub>.

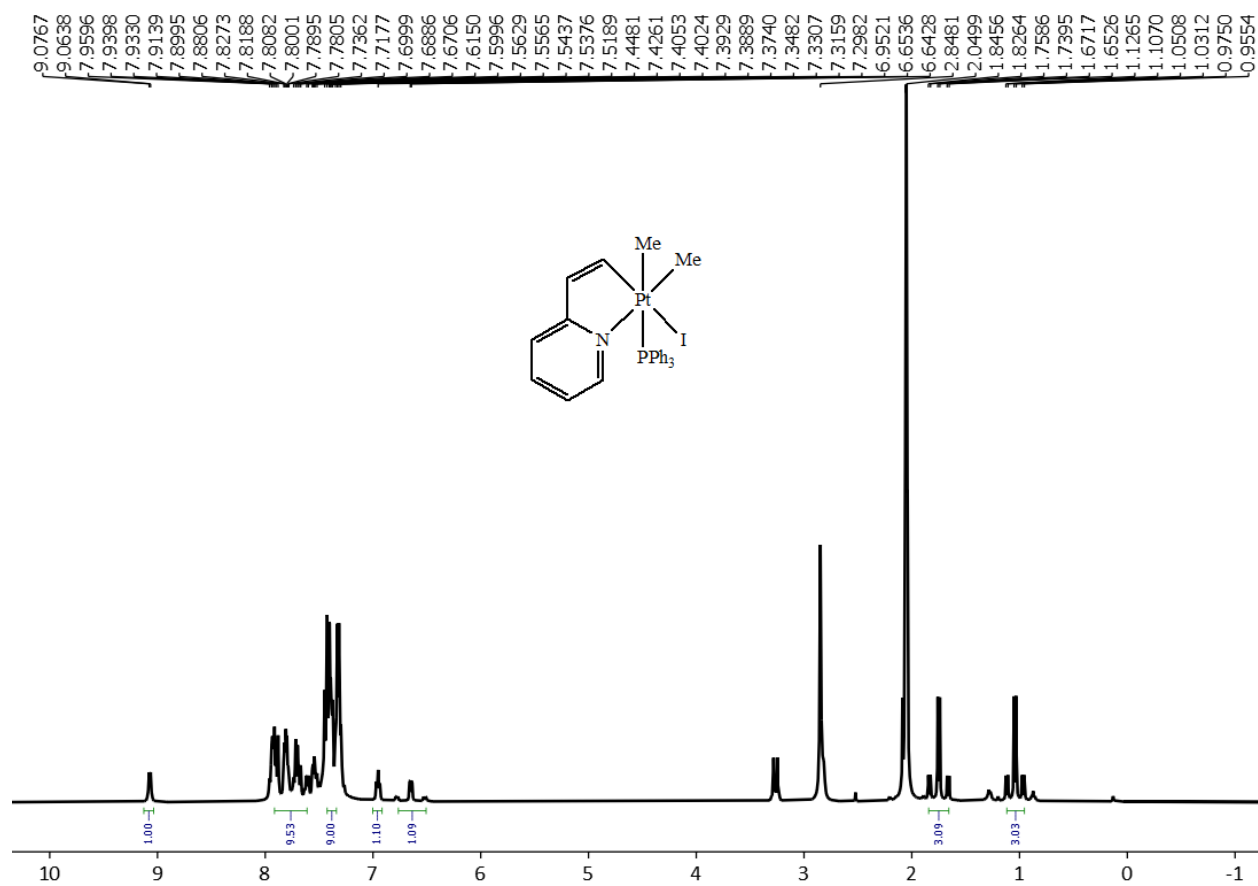

**Figure S3.** <sup>1</sup>H NMR spectrum of **3a** in acetone-*d*<sub>6</sub>.

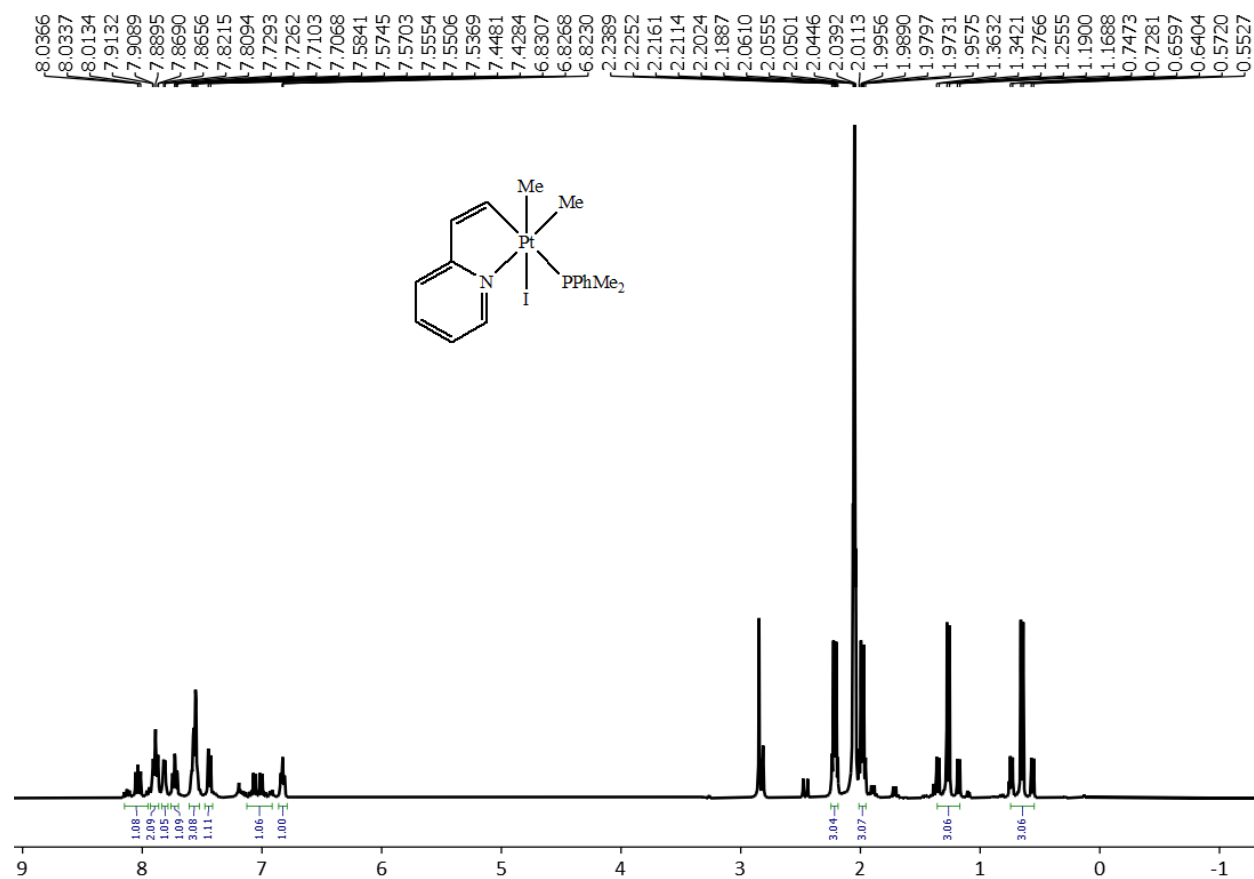

**Figure S4.**  $^1\text{H}$  NMR spectrum of **2c** in acetone- $d_6$ .

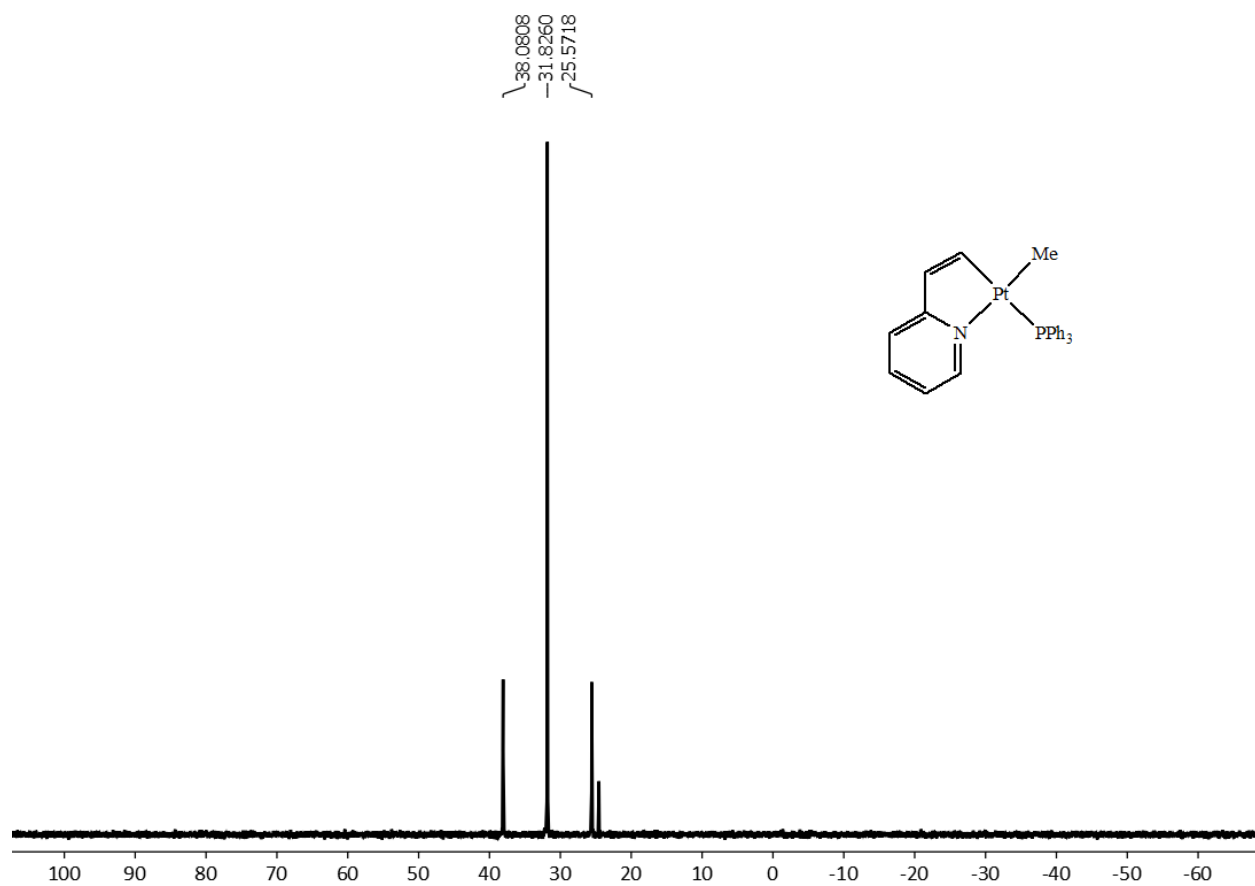

**Figure S5.**  $^{31}\text{P}\{^1\text{H}\}$  NMR spectrum of **1a** in  $\text{acetone-}d_6$ .

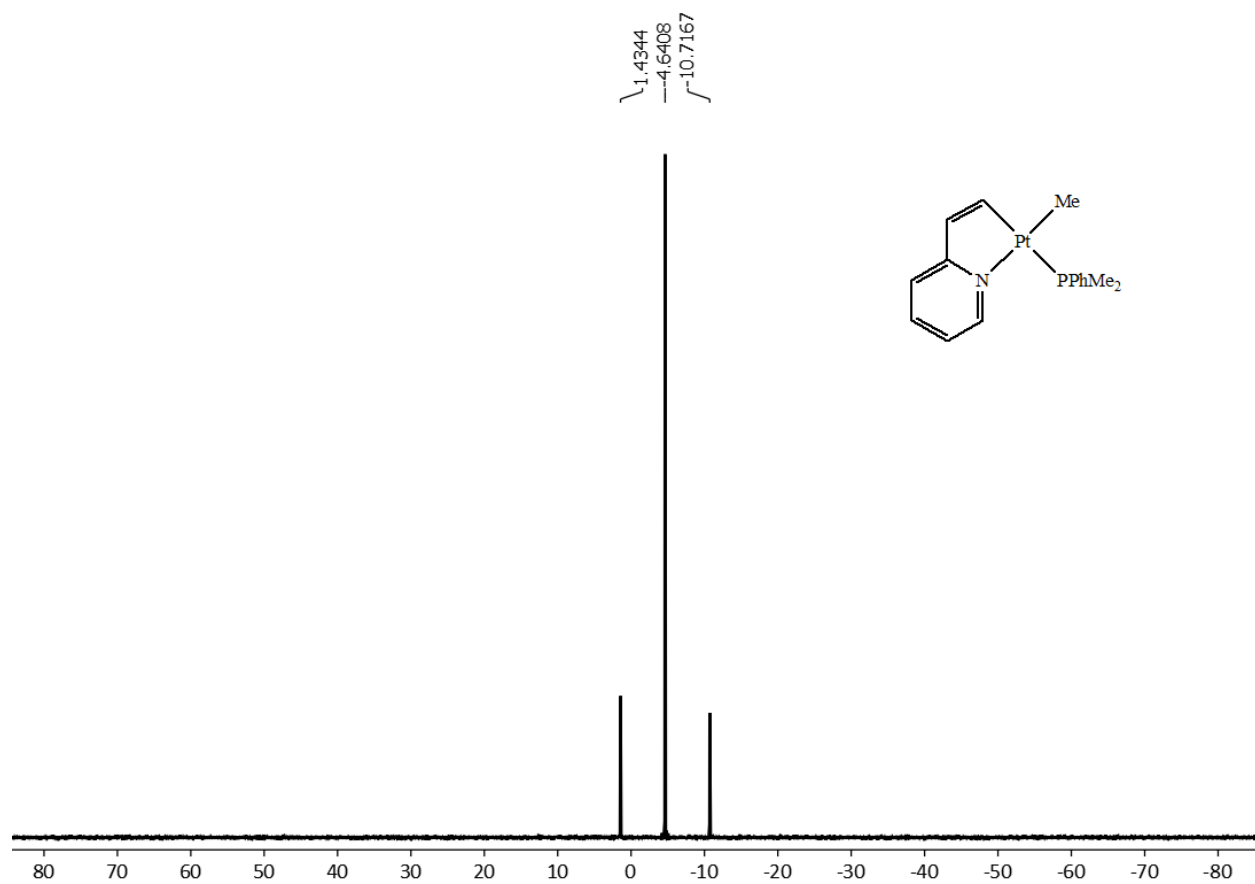

**Figure S6.**  $^{31}\text{P}\{^1\text{H}\}$  NMR spectrum of **1c** in acetone- $d_6$ .



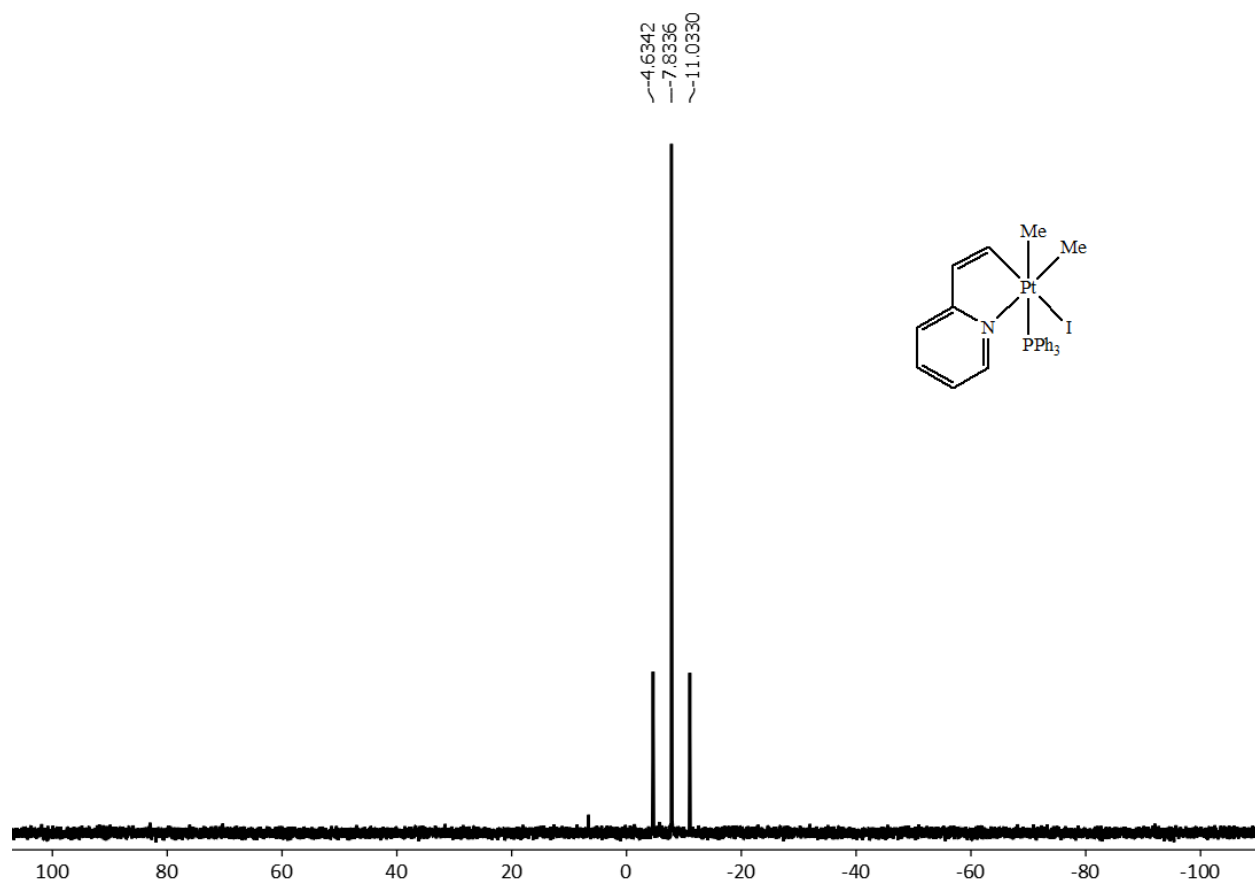

**Figure S7.**  $^{31}\text{P}\{^1\text{H}\}$  NMR spectrum of **3a** in acetone- $d_6$ .

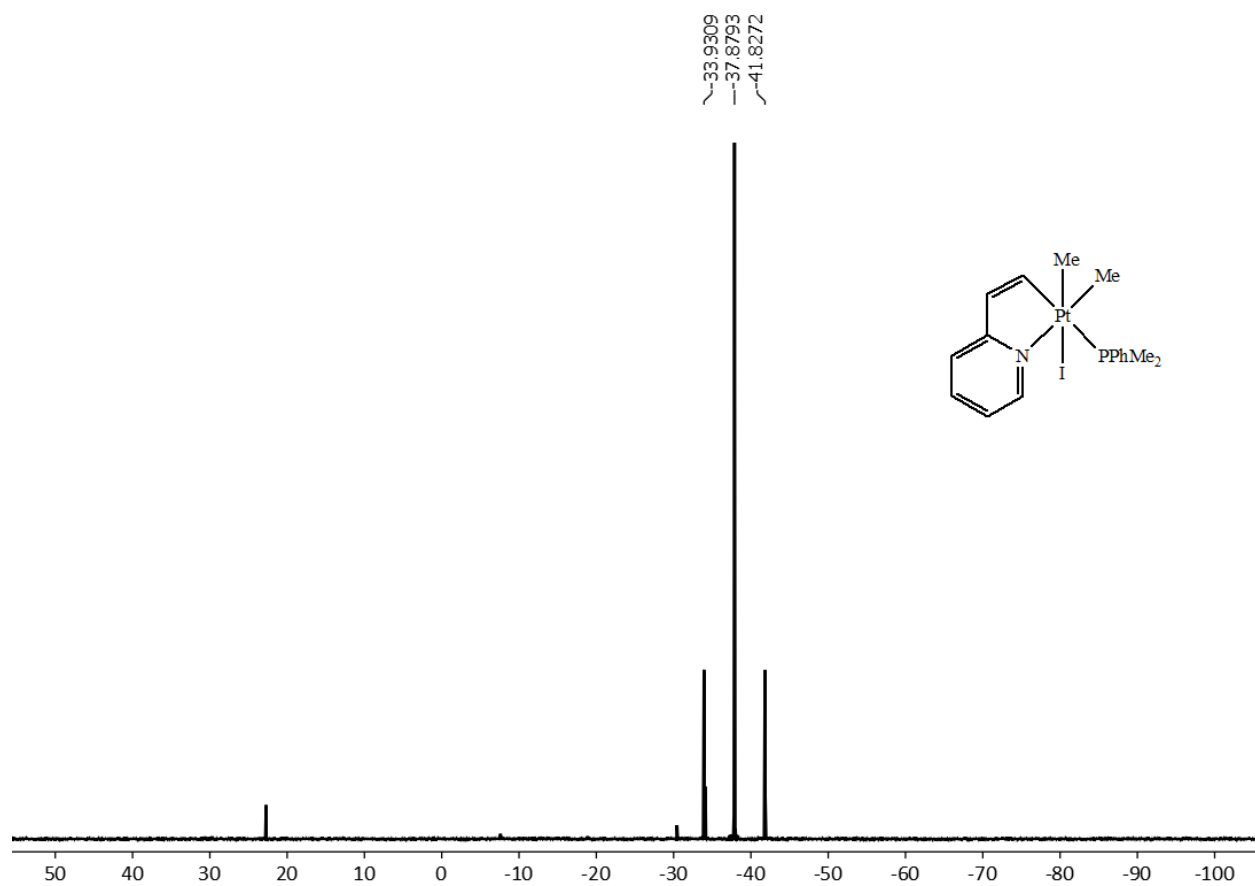

**Figure S8.**  $^{31}\text{P}\{^1\text{H}\}$  NMR spectrum of **2c** in acetone- $d_6$ .

**Table S1.** Crystal data and structure refinements for **1c** and **2c**.

|                                                                                                                    | <b>1c</b>                            | <b>2c</b>                             |
|--------------------------------------------------------------------------------------------------------------------|--------------------------------------|---------------------------------------|
| Formula                                                                                                            | C <sub>16</sub> H <sub>20</sub> NPPt | C <sub>17</sub> H <sub>23</sub> INPPt |
| Formula weight                                                                                                     | 452.39                               | 594.32                                |
| T, K                                                                                                               | 294(2)                               | 294(2)                                |
| Crystal system                                                                                                     | Monoclinic                           | Monoclinic                            |
| Space group                                                                                                        | P21/n                                | P21/c                                 |
| <i>a</i> (Å)                                                                                                       | 12.397(3)                            | 12.783(3)                             |
| <i>b</i> (Å)                                                                                                       | 8.8869(18)                           | 10.555(2)                             |
| <i>c</i> (Å)                                                                                                       | 14.831(3)                            | 14.278(3)                             |
| $\alpha$ (deg)                                                                                                     | 90                                   | 90                                    |
| $\beta$ (deg)                                                                                                      | 95.81(3)                             | 94.29(3)                              |
| $\gamma$ (deg)                                                                                                     | 90                                   | 90                                    |
| Z                                                                                                                  | 4                                    | 4                                     |
| Volume, Å <sup>3</sup>                                                                                             | 1625.6(6)                            | 1921.1(7)                             |
| Density, g/m <sup>3</sup>                                                                                          | 1.849                                | 2.055                                 |
| Data / restraints / parameters                                                                                     | 2863 / 0 / 175                       | 3168 / 175 / 193                      |
| Goodness-of-fit on F <sup>2</sup>                                                                                  | 0.502                                | 0.661                                 |
| <i>R</i> ( <i>F</i> obsd data)                                                                                     | <i>R</i> 1 = 0.0254                  | <i>R</i> 1 = 0.0578                   |
| <i>wR</i> ( <i>F</i> <sup>2</sup> all data)                                                                        | <i>wR</i> 2 = 0.0405                 | <i>wR</i> 2 = 0.1442                  |
| CCDC No.                                                                                                           | 2057874                              | 2057873                               |
| $R1 = \Sigma   F_o  -  F_c   / \Sigma  F_o $ $wR2 = \{ \Sigma [w(F_o^2 - F_c^2)^2] / \Sigma [w(F_o^2)^2] \}^{1/2}$ |                                      |                                       |

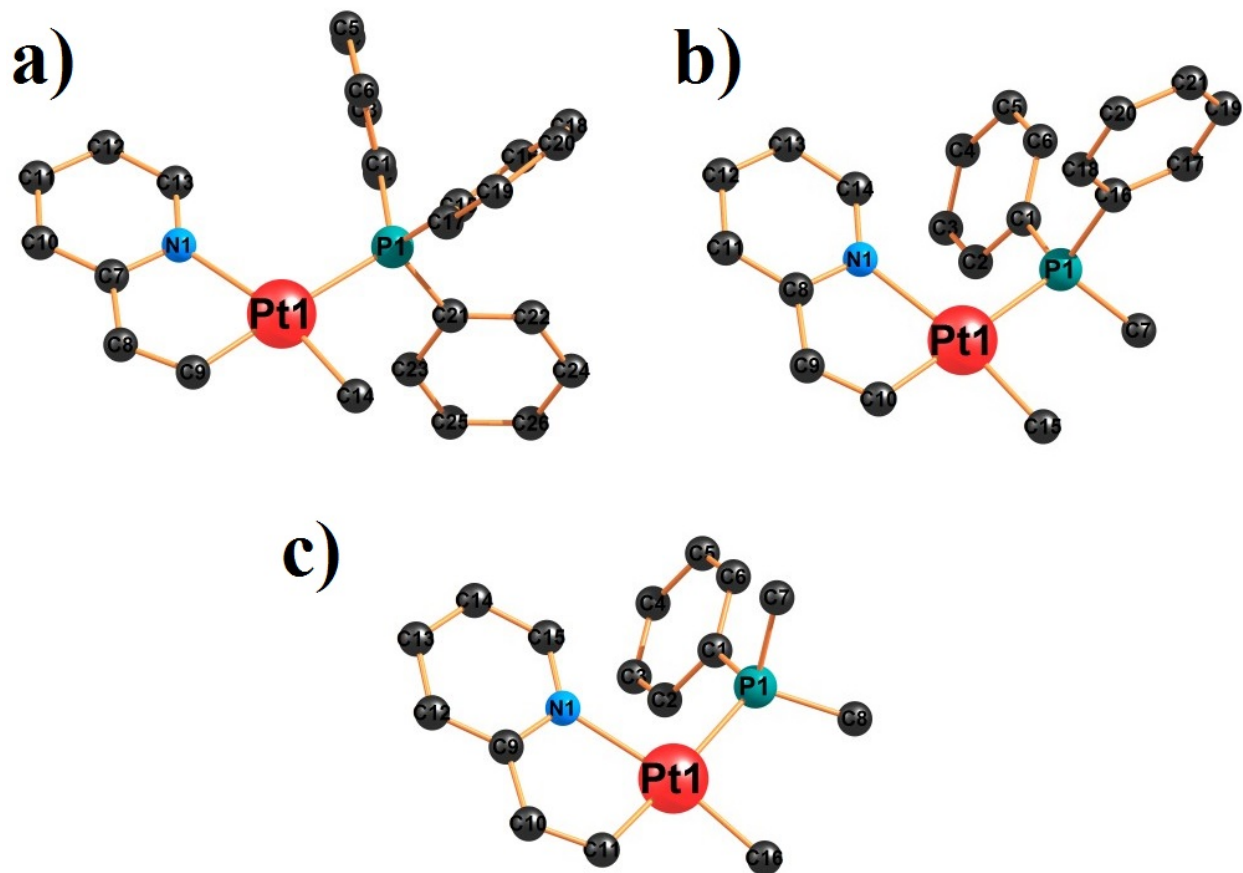

**Figure S9.** Optimized structures of a) **1a**, b) **1b** and c) **1c** in CH<sub>2</sub>Cl<sub>2</sub> solvent.

**Table S2.** Selected geometrical parameters for the optimized structures of **1a-1c**.

| <b>1a</b>            | <b>1b</b>            | <b>1c</b>            |
|----------------------|----------------------|----------------------|
| Pt1-P1 2.43015       | Pt1-P1 2.41912       | Pt1-P1 2.40937       |
| Pt1-N1 2.24333       | Pt1-N1 2.24359       | Pt1-N1 2.23517       |
| Pt1-C9 2.01262       | Pt1-C10 2.01298      | Pt1-C11 2.01418      |
| Pt1-C14 2.07504      | Pt1-C15 2.06778      | Pt1-C16 2.06659      |
| C9-Pt1-N1 77.94346   | C10-Pt1-N1 77.99727  | C11-Pt1-N1 78.12800  |
| N1-Pt1-P1 104.65230  | N1-Pt1-P1 101.12916  | N1-Pt1-P1 99.30456   |
| P1-Pt1-C14 89.37497  | P1-Pt1-C15 89.74736  | P1-Pt1-C16 90.95920  |
| C14-Pt1-C9 88.05046  | C15-Pt1-C10 91.15671 | C16-Pt1-C11 91.59204 |
| C9-Pt1-P1 177.31292  | C10-Pt1-P1 178.41196 | C11-Pt1-P1 176.47379 |
| N1-Pt1-C14 165.88684 | N1-Pt1-C15 169.05832 | N1-Pt1-C16 169.71877 |

**Table S3.** Composition (%) of frontier MOs in the ground state for **1a** in CH<sub>2</sub>Cl<sub>2</sub> solvent.

| MO     | Energy (eV) | Components (%) |    |     |                  |
|--------|-------------|----------------|----|-----|------------------|
|        |             | Pt             | Me | Vpy | PPh <sub>3</sub> |
| LUMO+5 | -0.414      | 1              | 0  | 19  | 80               |
| LUMO+4 | -0.532      | 4              | 1  | 1   | 94               |
| LUMO+3 | -0.621      | 8              | 1  | 53  | 38               |
| LUMO+2 | -0.757      | 10             | 1  | 16  | 73               |
| LUMO+1 | -0.917      | 4              | 0  | 5   | 91               |
| LUMO   | -1.472      | 11             | 1  | 77  | 11               |
| HOMO   | -5.608      | 42             | 0  | 54  | 4                |
| HOMO-1 | -5.812      | 85             | 3  | 8   | 4                |
| HOMO-2 | -6.110      | 86             | 3  | 8   | 3                |
| HOMO-3 | -6.411      | 14             | 1  | 22  | 62               |
| HOMO-4 | -6.687      | 72             | 9  | 12  | 7                |
| HOMO-5 | -6.955      | 3              | 1  | 4   | 92               |

**Table S4.** Composition (%) of frontier MOs in the ground state for **1b** in CH<sub>2</sub>Cl<sub>2</sub> solvent.

| MO     | Energy (eV) | Components (%) |    |     |                     |
|--------|-------------|----------------|----|-----|---------------------|
|        |             | Pt             | Me | Vpy | PPh <sub>2</sub> Me |
| LUMO+5 | -0.205      | 3              | 0  | 5   | 92                  |
| LUMO+4 | -0.366      | 1              | 4  | 7   | 88                  |
| LUMO+3 | -0.559      | 8              | 1  | 18  | 74                  |
| LUMO+2 | -0.628      | 5              | 0  | 66  | 29                  |
| LUMO+1 | -0.842      | 3              | 0  | 3   | 94                  |
| LUMO   | -1.476      | 11             | 2  | 80  | 7                   |
| HOMO   | -5.601      | 41             | 0  | 55  | 3                   |
| HOMO-1 | -5.829      | 87             | 3  | 7   | 3                   |
| HOMO-2 | -6.095      | 87             | 6  | 7   | 0                   |
| HOMO-3 | -6.496      | 17             | 3  | 27  | 53                  |
| HOMO-4 | -6.723      | 71             | 8  | 10  | 11                  |
| HOMO-5 | -7.029      | 2              | 1  | 1   | 96                  |

**Table S5.** Composition (%) of frontier MOs in the ground state for **1c** in CH<sub>2</sub>Cl<sub>2</sub> solvent.

| MO     | Energy (eV) | Components (%) |    |     |                    |
|--------|-------------|----------------|----|-----|--------------------|
|        |             | Pt             | Me | Vpy | PPhMe <sub>2</sub> |
| LUMO+5 | 0.799       | 30             | 17 | 28  | 25                 |
| LUMO+4 | 0.428       | 39             | 2  | 27  | 33                 |
| LUMO+3 | -0.293      | 5              | 0  | 5   | 89                 |
| LUMO+2 | -0.636      | 3              | 0  | 80  | 17                 |
| LUMO+1 | -0.696      | 4              | 0  | 12  | 84                 |
| LUMO   | -1.485      | 11             | 2  | 82  | 6                  |
| HOMO   | -5.599      | 41             | 0  | 55  | 3                  |
| HOMO-1 | -5.838      | 88             | 3  | 7   | 2                  |
| HOMO-2 | -6.095      | 87             | 6  | 7   | 0                  |
| HOMO-3 | -6.539      | 36             | 6  | 25  | 34                 |
| HOMO-4 | -6.804      | 55             | 6  | 17  | 21                 |
| HOMO-5 | -7.056      | 5              | 0  | 3   | 92                 |

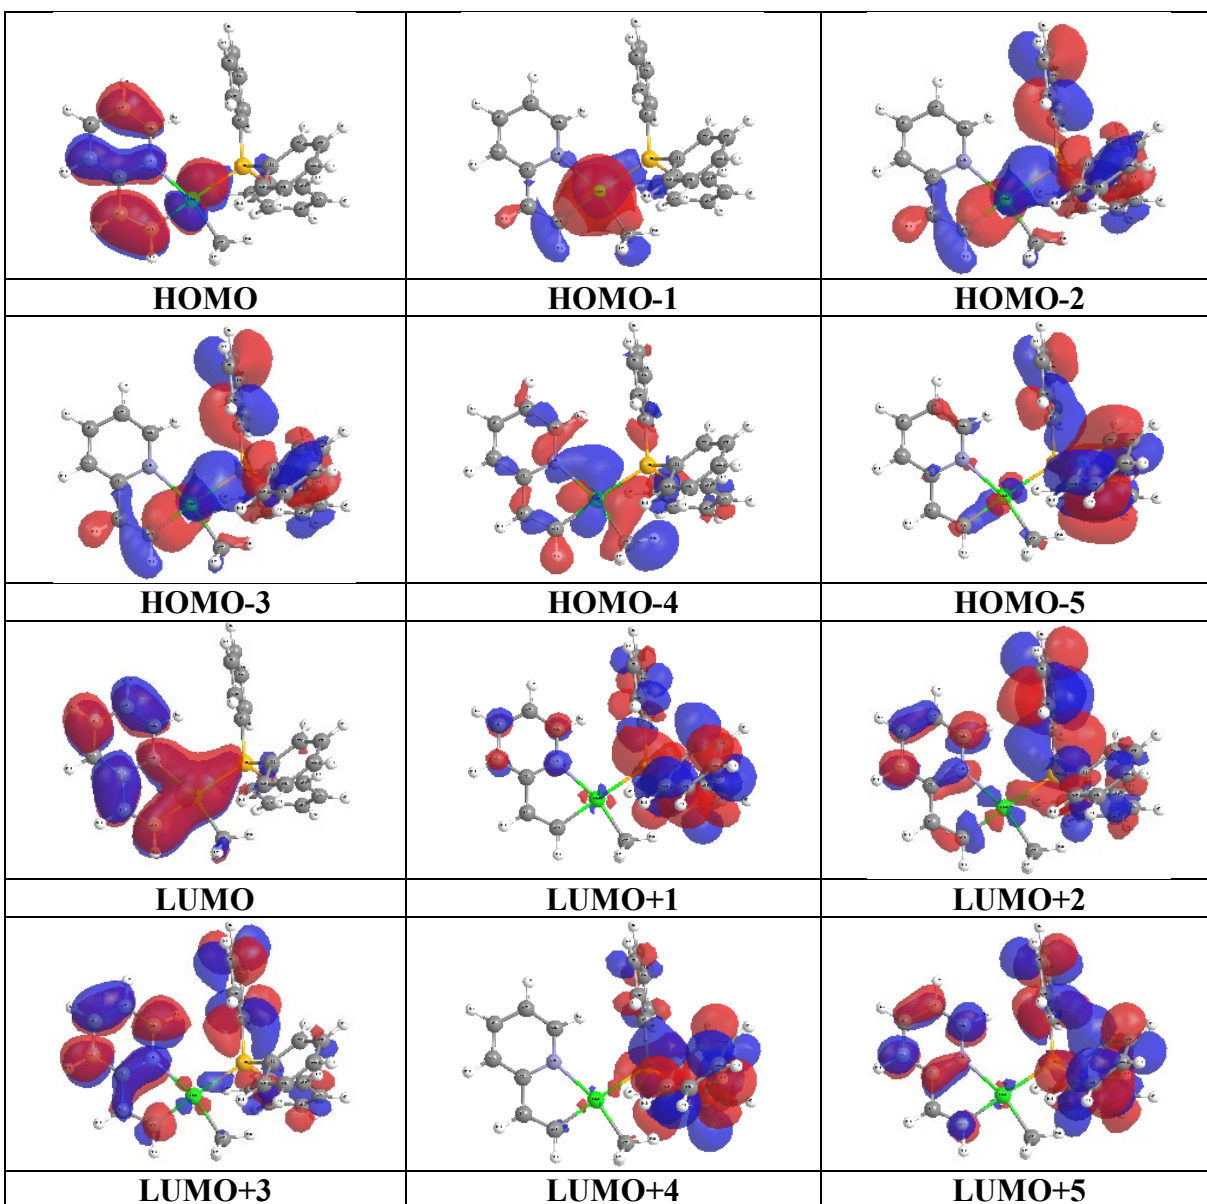

**Figure S10.** Selected MO plots of **1a**.

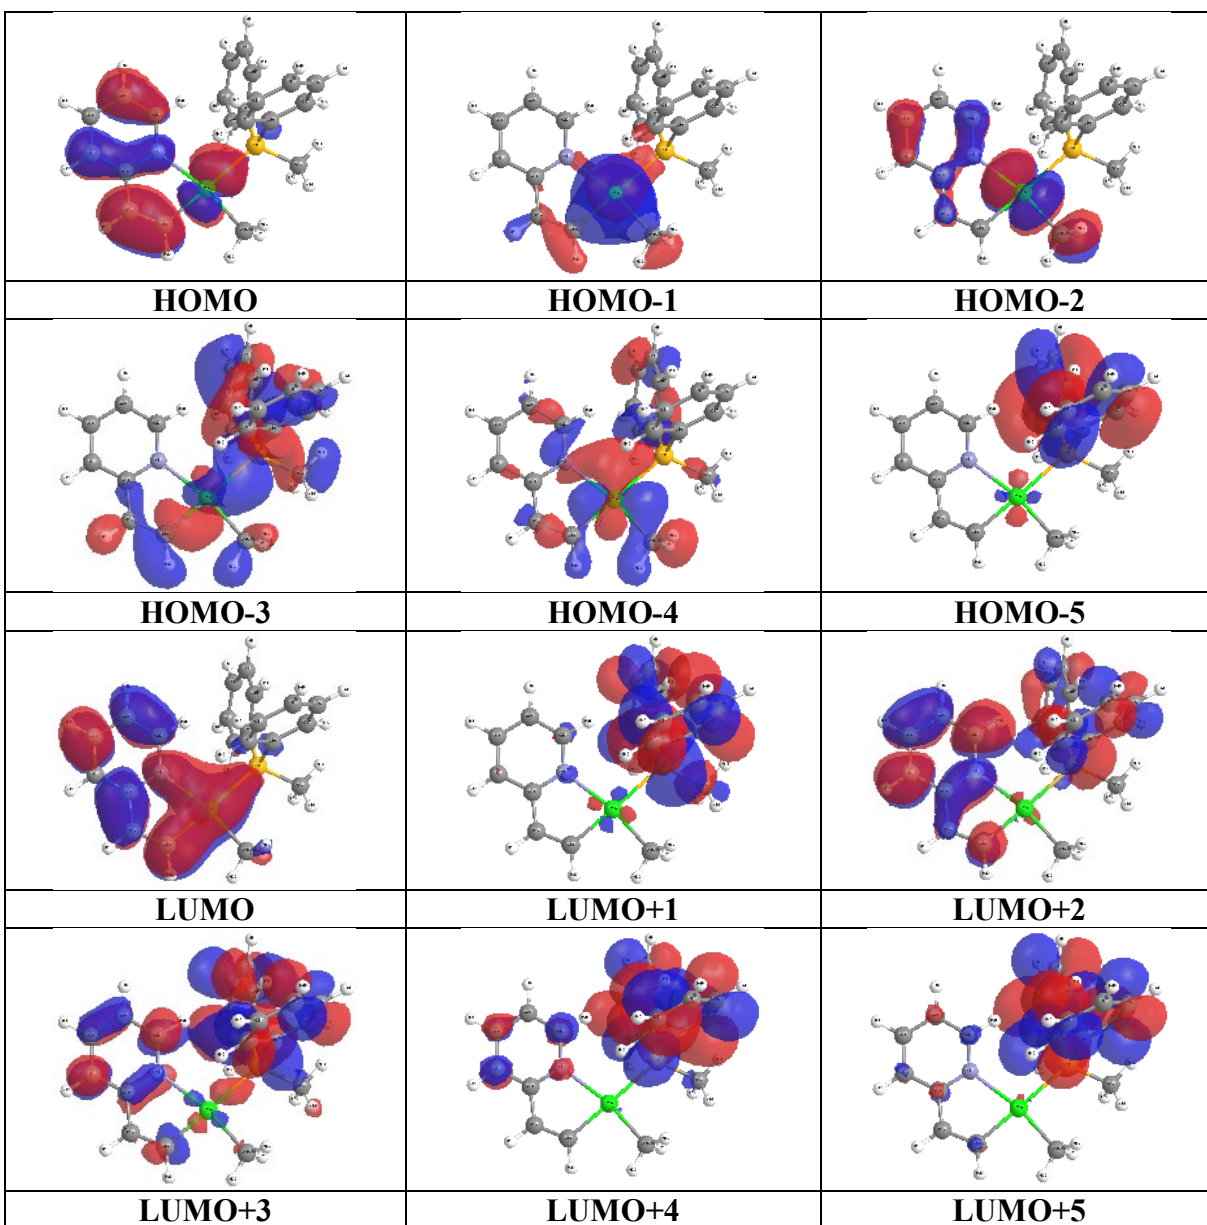

**Figure S11. Selected MO plots of 1b.**



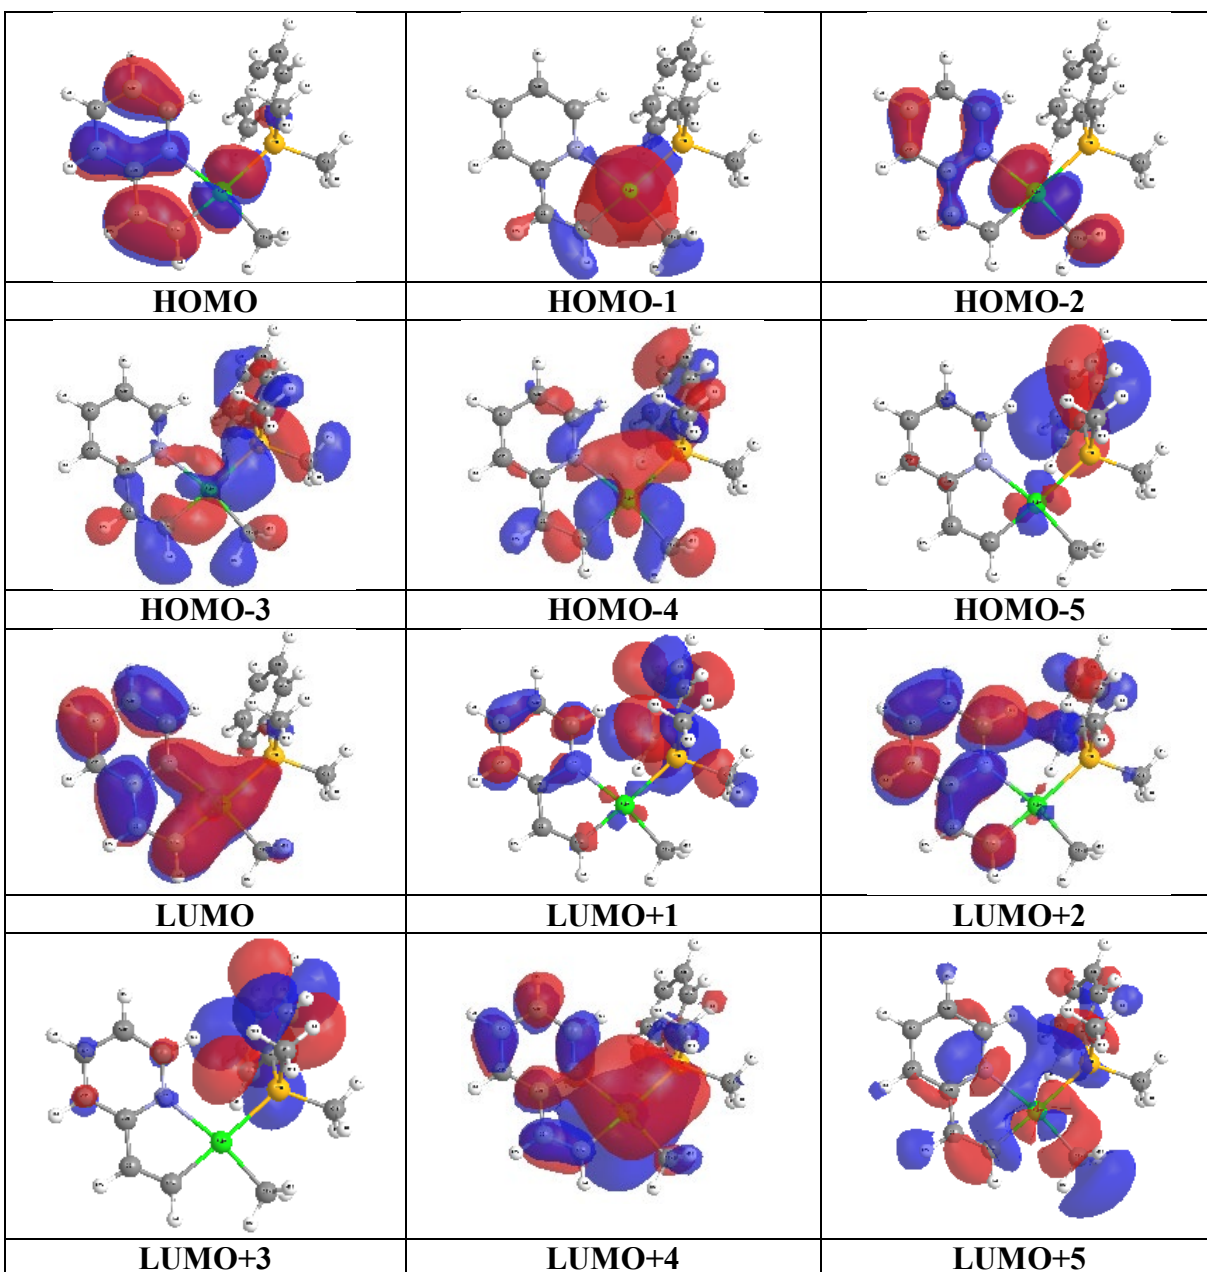

**Figure S12.** Selected MO plots of **1c**.
